# Supplementary material
Source: publisher figshare collection journal article supplement (https://gsajournals.figshare.com/ndownloader/files/22811825)
Supplement: Supplementary file 1 [file 22811825]

## Sheet: Sheet1
Figure 3
ALM axon						ALM soma						PLM soma
Sample	I	II	IVa	IVb		Sample	I	II	IVa	IVb		Sample	I	II	IVa	IVb
Mean	126.813	142.114	85.7396	155.226		Mean	15542.2	16122.7	9374.81	18690.7		Mean	13946.3	11985.4	10127.5	15332
SE	24.8992	32.977	17.366	32.5341		SE	666.011	676.05	533.566	545.21		SE	558.398	1065.84	635.391	721.534
n	11	11	10	9		n	12	13	12	13		n	25	23	24	26
Tukey's Honest Significance Test
Comparisons	P Values					Comparisons	P Values					Comparisons	P Values
I vs. II	0.9773					I vs. II	0.9085					I vs. II	0.3014
I vs. IVa	0.7157					I vs. IVa	< 0.00000001					I vs. IVa	0.0079
I vs. IVb	0.8915					I vs. IVb	0.0018					I vs. IVb	0.599
II vs. IVa	0.4746					II vs. IVa	< 0.00000001					II vs. IVa	0.348
II vs. IVb	0.9875					II vs. IVb	0.0185					II vs. IVb	0.0177
IVa vs. IVb	0.3357					IVa vs. IVb	< 0.00000001					IVa vs. IVb	0.0001
Figure 4
ALM axon
Sample	1	2	3	4	5	6	7	8	9	10	11	12	13	14	15	16	17	18	19	20	21	22
Mean	79.4859	120.587	21.6003	125.288	62.5841	345.433	338.313	291.982	175.745	338.666	199.594	281.64	228.492	393.333	211.593	330.028	110.829	255.52	134.679	290.432	605.447	649.212
SE	10.2345	23.8501	6.1202	20.9455	14.9529	28.1543	32.7119	28.4038	24.9931	29.4264	31.7974	17.246	35.5209	34.2887	30.9271	26.0311	20.0296	36.4863	14.3857	31.0554	35.615	46.988
n	19	11	13	14	11	12	13	14	11	10	13	13	13	12	13	13	11	13	25	13	11	12
ALM soma
Sample	1	2	3	4	5	6	7	8	9	10	11	12	13	14	15	16	17	18	19	20	21	22
Mean	4005.81	6331.11	882.091	7640.41	3853.31	17897.8	15539	13753.8	8828.14	14073.7	13760.9	22386.2	13496.2	20330.2	13639	17775.2	5078.6	13055.9	7002.65	14493.7	27879.3	45299.7
SE	179.881	382.87	190.397	968.101	525.3	991.557	585.466	724.884	577.829	676.23	1262.84	766.13	1373.35	859.678	1354.31	728.51	547.15	475.223	1157.64	947.213	1224.7	1715.73
n	19	12	12	14	11	13	13	14	11	10	13	12	13	12	13	13	11	13	13	13	10	12
PLM soma
Sample	1	2	3	4	5	6	7	8	9	10	11	12	13	14	15	16	17	18	19	20	21	22
Mean	4869.85	5643.11	806.878	6107.68	2335.28	18918.5	14652.3	15962.1	10535.9	14625.1	16612.4	31025.5	22399.5	28523.6	14803.4	27736.5	4487.31	25338.2	11219.5	17645.4	45529.8	33209.4
SE	185.417	408.707	179.807	641.273	325.943	665.375	833.284	736.035	677.698	882.567	852.898	1382.03	1191.47	1019.96	883.787	1385.91	217.22	1182.29	687.561	723.653	2453.69	1732.95
n	38	23	24	28	24	26	26	26	22	21	26	24	27	24	23	26	22	23	26	26	20	24
Tukey's Honest Significance Test
ALM axon			ALM Soma			PLM Soma
Comparison	P Value		Comparison	P Value		Comparison	P Value
1 vs. 2	1		1 vs. 2	0.938		1 vs. 2	1
1 vs. 3	0.9901		1 vs. 3	0.5309		1 vs. 3	0.1505
1 vs. 4	0.9994		1 vs. 4	0.1685		1 vs. 4	1
1 vs. 5	1		1 vs. 5	1		1 vs. 5	0.92
1 vs. 6	< 0.00000001		1 vs. 6	< 0.00000001		1 vs. 6	< 0.00000001
1 vs. 7	< 0.00000001		1 vs. 7	< 0.00000001		1 vs. 7	< 0.00000001
1 vs. 8	5e-07		1 vs. 8	< 0.00000001		1 vs. 8	< 0.00000001
1 vs. 9	0.548		1 vs. 9	0.017		1 vs. 9	0.0027
1 vs. 10	1e-08		1 vs. 10	< 0.00000001		1 vs. 10	< 0.00000001
1 vs. 11	0.0925		1 vs. 11	< 0.00000001		1 vs. 11	< 0.00000001
1 vs. 12	5.01e-06		1 vs. 12	< 0.00000001		1 vs. 12	< 0.00000001
1 vs. 13	0.0055		1 vs. 13	< 0.00000001		1 vs. 13	< 0.00000001
1 vs. 14	< 0.00000001		1 vs. 14	< 0.00000001		1 vs. 14	< 0.00000001
1 vs. 15	0.0319		1 vs. 15	< 0.00000001		1 vs. 15	< 0.00000001
1 vs. 16	< 0.00000001		1 vs. 16	< 0.00000001		1 vs. 16	< 0.00000001
1 vs. 17	1		1 vs. 17	1		1 vs. 17	1
1 vs. 18	0.0002		1 vs. 18	< 0.00000001		1 vs. 18	< 0.00000001
1 vs. 19	0.9623		1 vs. 19	0.5661		1 vs. 19	6.9e-05
1 vs. 20	1.32e-06		1 vs. 20	< 0.00000001		1 vs. 20	< 0.00000001
1 vs. 21	< 0.00000001		1 vs. 21	< 0.00000001		1 vs. 21	< 0.00000001
1 vs. 22	< 0.00000001		1 vs. 22	< 0.00000001		1 vs. 22	< 0.00000001
2 vs. 3	0.6469		2 vs. 3	0.0084		2 vs. 3	0.0845
2 vs. 4	1		2 vs. 4	1		2 vs. 4	1
2 vs. 5	0.9989		2 vs. 5	0.9659		2 vs. 5	0.7401
2 vs. 6	1.689e-05		2 vs. 6	< 0.00000001		2 vs. 6	< 0.00000001
2 vs. 7	2.45e-05		2 vs. 7	< 0.00000001		2 vs. 7	3e-08
2 vs. 8	0.0035		2 vs. 8	3.23e-06		2 vs. 8	< 0.00000001
2 vs. 9	0.9995		2 vs. 9	0.963		2 vs. 9	0.0936
2 vs. 10	0.0001		2 vs. 10	1.144e-05		2 vs. 10	2.9e-07
2 vs. 11	0.9315		2 vs. 11	5.33e-06		2 vs. 11	< 0.00000001
2 vs. 12	0.0125		2 vs. 12	< 0.00000001		2 vs. 12	< 0.00000001
2 vs. 13	0.474		2 vs. 13	1.529e-05		2 vs. 13	< 0.00000001
2 vs. 14	3e-08		2 vs. 14	< 0.00000001		2 vs. 14	< 0.00000001
2 vs. 15	0.7879		2 vs. 15	8.69e-06		2 vs. 15	6e-08
2 vs. 16	6.813e-05		2 vs. 16	< 0.00000001		2 vs. 16	< 0.00000001
2 vs. 17	1		2 vs. 17	1		2 vs. 17	1
2 vs. 18	0.1049		2 vs. 18	8.228e-05		2 vs. 18	< 0.00000001
2 vs. 19	1		2 vs. 19	1		2 vs. 19	0.0108
2 vs. 20	0.0054		2 vs. 20	2.5e-07		2 vs. 20	< 0.00000001
2 vs. 21	< 0.00000001		2 vs. 21	< 0.00000001		2 vs. 21	< 0.00000001
2 vs. 22	< 0.00000001		2 vs. 22	< 0.00000001		2 vs. 22	< 0.00000001
3 vs. 4	0.4291		3 vs. 4	4.641e-05		3 vs. 4	0.0151
3 vs. 5	1		3 vs. 5	0.8298		3 vs. 5	1
3 vs. 6	< 0.00000001		3 vs. 6	< 0.00000001		3 vs. 6	< 0.00000001
3 vs. 7	< 0.00000001		3 vs. 7	< 0.00000001		3 vs. 7	< 0.00000001
3 vs. 8	< 0.00000001		3 vs. 8	< 0.00000001		3 vs. 8	< 0.00000001
3 vs. 9	0.0231		3 vs. 9	2.45e-06		3 vs. 9	< 0.00000001
3 vs. 10	< 0.00000001		3 vs. 10	< 0.00000001		3 vs. 10	< 0.00000001
3 vs. 11	0.001		3 vs. 11	< 0.00000001		3 vs. 11	< 0.00000001
3 vs. 12	2e-08		3 vs. 12	< 0.00000001		3 vs. 12	< 0.00000001
3 vs. 13	3.005e-05		3 vs. 13	< 0.00000001		3 vs. 13	< 0.00000001
3 vs. 14	< 0.00000001		3 vs. 14	< 0.00000001		3 vs. 14	< 0.00000001
3 vs. 15	0.0003		3 vs. 15	< 0.00000001		3 vs. 15	< 0.00000001
3 vs. 16	< 0.00000001		3 vs. 16	< 0.00000001		3 vs. 16	< 0.00000001
3 vs. 17	0.815		3 vs. 17	0.206		3 vs. 17	0.5617
3 vs. 18	7.4e-07		3 vs. 18	< 0.00000001		3 vs. 18	< 0.00000001
3 vs. 19	0.101		3 vs. 19	0.0007		3 vs. 19	< 0.00000001
3 vs. 20	< 0.00000001		3 vs. 20	< 0.00000001		3 vs. 20	< 0.00000001
3 vs. 21	< 0.00000001		3 vs. 21	< 0.00000001		3 vs. 21	< 0.00000001
3 vs. 22	< 0.00000001		3 vs. 22	< 0.00000001		3 vs. 22	< 0.00000001
4 vs. 5	0.9933		4 vs. 5	0.3216		4 vs. 5	0.3878
4 vs. 6	5.59e-06		4 vs. 6	< 0.00000001		4 vs. 6	< 0.00000001
4 vs. 7	7.92e-06		4 vs. 7	2e-07		4 vs. 7	4e-08
4 vs. 8	0.0018		4 vs. 8	0.0002		4 vs. 8	< 0.00000001
4 vs. 9	0.9997		4 vs. 9	1		4 vs. 9	0.1538
4 vs. 10	5.547e-05		4 vs. 10	0.0005		4 vs. 10	4e-07
4 vs. 11	0.9313		4 vs. 11	0.0003		4 vs. 11	< 0.00000001
4 vs. 12	0.0076		4 vs. 12	< 0.00000001		4 vs. 12	< 0.00000001
4 vs. 13	0.4387		4 vs. 13	0.0008		4 vs. 13	< 0.00000001
4 vs. 14	< 0.00000001		4 vs. 14	< 0.00000001		4 vs. 14	< 0.00000001
4 vs. 15	0.7752		4 vs. 15	0.0005		4 vs. 15	7e-08
4 vs. 16	2.437e-05		4 vs. 16	< 0.00000001		4 vs. 16	< 0.00000001
4 vs. 17	1		4 vs. 17	0.9331		4 vs. 17	0.9999
4 vs. 18	0.0811		4 vs. 18	0.0035		4 vs. 18	< 0.00000001
4 vs. 19	1		4 vs. 19	1		4 vs. 19	0.0187
4 vs. 20	0.003		4 vs. 20	1.803e-05		4 vs. 20	< 0.00000001
4 vs. 21	< 0.00000001		4 vs. 21	< 0.00000001		4 vs. 21	< 0.00000001
4 vs. 22	< 0.00000001		4 vs. 22	< 0.00000001		4 vs. 22	< 0.00000001
5 vs. 6	< 0.00000001		5 vs. 6	< 0.00000001		5 vs. 6	< 0.00000001
5 vs. 7	< 0.00000001		5 vs. 7	< 0.00000001		5 vs. 7	< 0.00000001
5 vs. 8	3.3e-06		5 vs. 8	< 0.00000001		5 vs. 8	< 0.00000001
5 vs. 9	0.4585		5 vs. 9	0.0515		5 vs. 9	3.06e-06
5 vs. 10	1e-07		5 vs. 10	< 0.00000001		5 vs. 10	< 0.00000001
5 vs. 11	0.0905		5 vs. 11	< 0.00000001		5 vs. 11	< 0.00000001
5 vs. 12	2.072e-05		5 vs. 12	< 0.00000001		5 vs. 12	< 0.00000001
5 vs. 13	0.0079		5 vs. 13	< 0.00000001		5 vs. 13	< 0.00000001
5 vs. 14	< 0.00000001		5 vs. 14	< 0.00000001		5 vs. 14	< 0.00000001
5 vs. 15	0.0357		5 vs. 15	< 0.00000001		5 vs. 15	< 0.00000001
5 vs. 16	3e-08		5 vs. 16	< 0.00000001		5 vs. 16	< 0.00000001
5 vs. 17	0.9999		5 vs. 17	1		5 vs. 17	0.9969
5 vs. 18	0.0005		5 vs. 18	< 0.00000001		5 vs. 18	< 0.00000001
5 vs. 19	0.9083		5 vs. 19	0.716		5 vs. 19	4e-08
5 vs. 20	6.71e-06		5 vs. 20	< 0.00000001		5 vs. 20	< 0.00000001
5 vs. 21	< 0.00000001		5 vs. 21	< 0.00000001		5 vs. 21	< 0.00000001
5 vs. 22	< 0.00000001		5 vs. 22	< 0.00000001		5 vs. 22	< 0.00000001
6 vs. 7	1		6 vs. 7	0.961		6 vs. 7	0.1677
6 vs. 8	0.9989		6 vs. 8	0.1178		6 vs. 8	0.8296
6 vs. 9	0.0074		6 vs. 9	1e-08		6 vs. 9	7.9e-07
6 vs. 10	1		6 vs. 10	0.3864		6 vs. 10	0.2444
6 vs. 11	0.035		6 vs. 11	0.1405		6 vs. 11	0.9839
6 vs. 12	0.9911		6 vs. 12	0.0791		6 vs. 12	< 0.00000001
6 vs. 13	0.2716		6 vs. 13	0.0784		6 vs. 13	0.529
6 vs. 14	0.9999		6 vs. 14	0.9567		6 vs. 14	< 0.00000001
6 vs. 15	0.0908		6 vs. 15	0.1083		6 vs. 15	0.2754
6 vs. 16	1		6 vs. 16	1		6 vs. 16	2e-08
6 vs. 17	4.9e-06		6 vs. 17	< 0.00000001		6 vs. 17	< 0.00000001
6 vs. 18	0.7716		6 vs. 18	0.0258		6 vs. 18	0.0008
6 vs. 19	6e-07		6 vs. 19	< 0.00000001		6 vs. 19	3.14e-06
6 vs. 20	0.9987		6 vs. 20	0.4813		6 vs. 20	1
6 vs. 21	1.6e-07		6 vs. 21	< 0.00000001		6 vs. 21	< 0.00000001
6 vs. 22	< 0.00000001		6 vs. 22	< 0.00000001		6 vs. 22	< 0.00000001
7 vs. 8	0.9998		7 vs. 8	0.9983		7 vs. 8	1
7 vs. 9	0.0108		7 vs. 9	0.0002		7 vs. 9	0.2966
7 vs. 10	1		7 vs. 10	1		7 vs. 10	1
7 vs. 11	0.0499		7 vs. 11	0.9988		7 vs. 11	0.9979
7 vs. 12	0.9975		7 vs. 12	5.202e-05		7 vs. 12	< 0.00000001
7 vs. 13	0.3504		7 vs. 13	0.9922		7 vs. 13	1.89e-06
7 vs. 14	0.9987		7 vs. 14	0.0381		7 vs. 14	< 0.00000001
7 vs. 15	0.1253		7 vs. 15	0.9969		7 vs. 15	1
7 vs. 16	1		7 vs. 16	0.9778		7 vs. 16	< 0.00000001
7 vs. 17	7.04e-06		7 vs. 17	< 0.00000001		7 vs. 17	< 0.00000001
7 vs. 18	0.8533		7 vs. 18	0.9357		7 vs. 18	< 0.00000001
7 vs. 19	7.8e-07		7 vs. 19	2e-08		7 vs. 19	0.5769
7 vs. 20	0.9998		7 vs. 20	1		7 vs. 20	0.8136
7 vs. 21	3e-08		7 vs. 21	< 0.00000001		7 vs. 21	< 0.00000001
7 vs. 22	< 0.00000001		7 vs. 22	< 0.00000001		7 vs. 22	< 0.00000001
8 vs. 9	0.2939		8 vs. 9	0.0293		8 vs. 9	0.0193
8 vs. 10	0.9999		8 vs. 10	1		8 vs. 10	1
8 vs. 11	0.6606		8 vs. 11	1		8 vs. 11	1
8 vs. 12	1		8 vs. 12	2e-08		8 vs. 12	< 0.00000001
8 vs. 13	0.9867		8 vs. 13	1		8 vs. 13	0.0003
8 vs. 14	0.5196		8 vs. 14	9.289e-05		8 vs. 14	< 0.00000001
8 vs. 15	0.8656		8 vs. 15	1		8 vs. 15	1
8 vs. 16	1		8 vs. 16	0.1531		8 vs. 16	< 0.00000001
8 vs. 17	0.0012		8 vs. 17	3e-08		8 vs. 17	< 0.00000001
8 vs. 18	1		8 vs. 18	1		8 vs. 18	< 0.00000001
8 vs. 19	0.0005		8 vs. 19	2.722e-05		8 vs. 19	0.0605
8 vs. 20	1		8 vs. 20	1		8 vs. 20	0.9998
8 vs. 21	< 0.00000001		8 vs. 21	< 0.00000001		8 vs. 21	< 0.00000001
8 vs. 22	< 0.00000001		8 vs. 22	< 0.00000001		8 vs. 22	< 0.00000001
9 vs. 10	0.026		9 vs. 10	0.0367		9 vs. 10	0.4117
9 vs. 11	1		9 vs. 11	0.0354		9 vs. 11	0.0031
9 vs. 12	0.5128		9 vs. 12	< 0.00000001		9 vs. 12	< 0.00000001
9 vs. 13	0.9995		9 vs. 13	0.0668		9 vs. 13	< 0.00000001
9 vs. 14	4.121e-05		9 vs. 14	< 0.00000001		9 vs. 14	< 0.00000001
9 vs. 15	1		9 vs. 15	0.0478		9 vs. 15	0.2837
9 vs. 16	0.0228		9 vs. 16	2e-08		9 vs. 16	< 0.00000001
9 vs. 17	0.995		9 vs. 17	0.4542		9 vs. 17	0.0068
9 vs. 18	0.9252		9 vs. 18	0.1684		9 vs. 18	< 0.00000001
9 vs. 19	0.9999		9 vs. 19	0.999		9 vs. 19	1
9 vs. 20	0.3507		9 vs. 20	0.0047		9 vs. 20	0.0001
9 vs. 21	< 0.00000001		9 vs. 21	< 0.00000001		9 vs. 21	< 0.00000001
9 vs. 22	< 0.00000001		9 vs. 22	< 0.00000001		9 vs. 22	< 0.00000001
10 vs. 11	0.1011		10 vs. 11	1		10 vs. 11	0.9989
10 vs. 12	0.9989		10 vs. 12	1.31e-06		10 vs. 12	< 0.00000001
10 vs. 13	0.4855		10 vs. 13	1		10 vs. 13	1.019e-05
10 vs. 14	0.9996		10 vs. 14	0.0018		10 vs. 14	< 0.00000001
10 vs. 15	0.2156		10 vs. 15	1		10 vs. 15	1
10 vs. 16	1		10 vs. 16	0.4527		10 vs. 16	< 0.00000001
10 vs. 17	4.082e-05		10 vs. 17	1.8e-07		10 vs. 17	< 0.00000001
10 vs. 18	0.9145		10 vs. 18	1		10 vs. 18	< 0.00000001
10 vs. 19	1.201e-05		10 vs. 19	8.078e-05		10 vs. 19	0.6997
10 vs. 20	0.9999		10 vs. 20	1		10 vs. 20	0.8697
10 vs. 21	3.3e-07		10 vs. 21	< 0.00000001		10 vs. 21	< 0.00000001
10 vs. 22	< 0.00000001		10 vs. 22	< 0.00000001		10 vs. 22	< 0.00000001
11 vs. 12	0.8633		11 vs. 12	3e-08		11 vs. 12	< 0.00000001
11 vs. 13	1		11 vs. 13	1		11 vs. 13	0.0029
11 vs. 14	0.0003		11 vs. 14	0.0001		11 vs. 14	< 0.00000001
11 vs. 15	1		11 vs. 15	1		11 vs. 15	0.9996
11 vs. 16	0.0957		11 vs. 16	0.1798		11 vs. 16	< 0.00000001
11 vs. 17	0.8218		11 vs. 17	6e-08		11 vs. 17	< 0.00000001
11 vs. 18	0.9979		11 vs. 18	1		11 vs. 18	1.2e-07
11 vs. 19	0.9408		11 vs. 19	4.296e-05		11 vs. 19	0.0111
11 vs. 20	0.7228		11 vs. 20	1		11 vs. 20	1
11 vs. 21	< 0.00000001		11 vs. 21	< 0.00000001		11 vs. 21	< 0.00000001
11 vs. 22	< 0.00000001		11 vs. 22	< 0.00000001		11 vs. 22	< 0.00000001
12 vs. 13	0.999		12 vs. 13	< 0.00000001		12 vs. 13	9e-08
12 vs. 14	0.3573		12 vs. 14	0.9949		12 vs. 14	0.9744
12 vs. 15	0.9678		12 vs. 15	2e-08		12 vs. 15	< 0.00000001
12 vs. 16	0.9997		12 vs. 16	0.0594		12 vs. 16	0.698
12 vs. 17	0.0049		12 vs. 17	< 0.00000001		12 vs. 17	< 0.00000001
12 vs. 18	1		12 vs. 18	< 0.00000001		12 vs. 18	0.0107
12 vs. 19	0.0029		12 vs. 19	< 0.00000001		12 vs. 19	< 0.00000001
12 vs. 20	1		12 vs. 20	7.9e-07		12 vs. 20	< 0.00000001
12 vs. 21	< 0.00000001		12 vs. 21	0.0152		12 vs. 21	< 0.00000001
12 vs. 22	< 0.00000001		12 vs. 22	< 0.00000001		12 vs. 22	0.9949
13 vs. 14	0.006		13 vs. 14	5.466e-05		13 vs. 14	0.0015
13 vs. 15	1		13 vs. 15	1		13 vs. 15	9.64e-06
13 vs. 16	0.5097		13 vs. 16	0.1035		13 vs. 16	0.0113
13 vs. 17	0.3021		13 vs. 17	1.9e-07		13 vs. 17	< 0.00000001
13 vs. 18	1		13 vs. 18	1		13 vs. 18	0.8633
13 vs. 19	0.3907		13 vs. 19	0.0001		13 vs. 19	< 0.00000001
13 vs. 20	0.992		13 vs. 20	1		13 vs. 20	0.053
13 vs. 21	< 0.00000001		13 vs. 21	< 0.00000001		13 vs. 21	< 0.00000001
13 vs. 22	< 0.00000001		13 vs. 22	< 0.00000001		13 vs. 22	< 0.00000001
14 vs. 15	0.001		14 vs. 15	9.32e-05		14 vs. 15	< 0.00000001
14 vs. 16	0.9919		14 vs. 16	0.9307		14 vs. 16	1
14 vs. 17	< 0.00000001		14 vs. 17	< 0.00000001		14 vs. 17	< 0.00000001
14 vs. 18	0.0672		14 vs. 18	9.94e-06		14 vs. 18	0.7978
14 vs. 19	< 0.00000001		14 vs. 19	< 0.00000001		14 vs. 19	< 0.00000001
14 vs. 20	0.5242		14 vs. 20	0.0018		14 vs. 20	< 0.00000001
14 vs. 21	7.94e-05		14 vs. 21	2.321e-05		14 vs. 21	< 0.00000001
14 vs. 22	1.3e-07		14 vs. 22	< 0.00000001		14 vs. 22	0.1039
15 vs. 16	0.2164		15 vs. 16	0.1407		15 vs. 16	< 0.00000001
15 vs. 17	0.6128		15 vs. 17	1e-07		15 vs. 17	< 0.00000001
15 vs. 18	0.9999		15 vs. 18	1		15 vs. 18	< 0.00000001
15 vs. 19	0.7694		15 vs. 19	6.868e-05		15 vs. 19	0.5534
15 vs. 20	0.9012		15 vs. 20	1		15 vs. 20	0.9036
15 vs. 21	< 0.00000001		15 vs. 21	< 0.00000001		15 vs. 21	< 0.00000001
15 vs. 22	< 0.00000001		15 vs. 22	< 0.00000001		15 vs. 22	< 0.00000001
16 vs. 17	2.035e-05		16 vs. 17	< 0.00000001		16 vs. 17	< 0.00000001
16 vs. 18	0.9405		16 vs. 18	0.0357		16 vs. 18	0.9824
16 vs. 19	2.97e-06		16 vs. 19	< 0.00000001		16 vs. 19	< 0.00000001
16 vs. 20	1		16 vs. 20	0.5564		16 vs. 20	< 0.00000001
16 vs. 21	< 0.00000001		16 vs. 21	< 0.00000001		16 vs. 21	< 0.00000001
16 vs. 22	< 0.00000001		16 vs. 22	< 0.00000001		16 vs. 22	0.0121
17 vs. 18	0.0506		17 vs. 18	1.19e-06		17 vs. 18	< 0.00000001
17 vs. 19	1		17 vs. 19	0.998		17 vs. 19	0.0004
17 vs. 20	0.002		17 vs. 20	< 0.00000001		17 vs. 20	< 0.00000001
17 vs. 21	< 0.00000001		17 vs. 21	< 0.00000001		17 vs. 21	< 0.00000001
17 vs. 22	< 0.00000001		17 vs. 22	< 0.00000001		17 vs. 22	< 0.00000001
18 vs. 19	0.0503		18 vs. 19	0.0006		18 vs. 19	< 0.00000001
18 vs. 20	1		18 vs. 20	1		18 vs. 20	8.58e-06
18 vs. 21	< 0.00000001		18 vs. 21	< 0.00000001		18 vs. 21	< 0.00000001
18 vs. 22	< 0.00000001		18 vs. 22	< 0.00000001		18 vs. 22	7.67e-06
19 vs. 20	0.0009		19 vs. 20	2.21e-06		19 vs. 20	0.0004
19 vs. 21	< 0.00000001		19 vs. 21	< 0.00000001		19 vs. 21	< 0.00000001
19 vs. 22	< 0.00000001		19 vs. 22	< 0.00000001		19 vs. 22	< 0.00000001
20 vs. 21	< 0.00000001		20 vs. 21	< 0.00000001		20 vs. 21	< 0.00000001
20 vs. 22	< 0.00000001		20 vs. 22	< 0.00000001		20 vs. 22	< 0.00000001
21 vs. 22	1		21 vs. 22	< 0.00000001		21 vs. 22	< 0.00000001
